# Supplementary material
Source: Research Square preprint supplement (doi:10.21203/rs.3.rs-8865828/v1)
Supplement: Supplementary file 1 [file 667b73b12004fe5cf9d05679.docx]

***Supplementary Figure 1. Cytotoxicity and CAR T expansion of CARhinge8 and CARhinge28 cells assessed by a real-time cytotoxicity assay against CD19 V174 (VAL/VAL homozygous) and CD19 V174L (VAL/LEU heterozygous)-expressing cell lines. A-B.*** *Real-time cytotoxicity assay against V174 hom. target cell lines RIVA* ***(A)*** *and HBL-1* ***(B)*** *at a 1:1 E:T over 72h.* ***C-E.*** *Real-time cytotoxicity assay against V174L het. target cell lines Ramos* ***(C)****, U2932* ***(D)*** *and Oci-Ly-1* ***(E)*** *at a 1:1 E:T over 72h.* ***F-G.*** *Fold-change in CAR T expansion after stimulation with V174 hom. target cell lines RIVA* ***(F)*** *and HBL-1* ***(G)*** *(E:T ratio of 1:1), measured trough detection of m-Cherry signal over 72h.* ***H-J.*** *Fold-change in CAR T expansion after stimulation with V174L het. target cell lines Ramos* ***(H)****, U2932* ***(I)*** *and Oci-Ly-1* ***(J)*** *(E:T ratio of 1:1), measured trough detection of m-Cherry signal over 72h. Data are plotted as the mean from biological triplicates +/- SEM. Stars indicate significance assessed by multiple unpaired t-tests. *p<0.05; ***p<0.001; ****<0.0001 E:T = effector to target ratio. UTD= untransduced T cell. ns=not significant*

***Supplemenatry Figure 2. Cytotoxicity of CARhinge8 and CARhinge28 cells against CD19 V174 (VAL/VAL homozygous) and CD19 V174L (VAL/LEU heterozygous)-expressing cell lines assessed by a luciferase based killing assay. A-B.*** *Cytotoxocity of CAR T cells against V174 hom. target cell lines RIVA* ***(A)*** *and HBL-1* ***(B)*** *(E:T ratio 1:1) after 48h assessed with a luciferase-based cytotoxicity assay.* ***C-E.*** *Cytotoxocity of CAR T cells against V174L het. target cell lines Ramos* ***(C)****, U2932* ***(D)*** *and Oci-Ly-1* ***(E)*** *(E:T ratio 1:1) after 48h assessed with a luciferase-based cytotoxicity assay. Data are plotted as the mean from biological triplicates +/- SEM. Stars indicate significance assessed by unpaired t-test. *p<0.05; **p<0.01; ***p<0.001; ****<0.0001 E:T = effector to target ratio. UTD= untransduced T cell. ns=not significant*

***Supplementary Figure 3. Clinical correlation of CAR T cell targeting CD19 of V174 homozygous or CD19 V174L (VAL/LEU heterozygous) heterozygous lymphoma in 91 patients. A.*** *PFS**Kaplan-Meier curve depicting retrospective analysis of 53 patients treated with anti-CD19 CAR T cell (axi-cel and tisa-cel) targeting CD19 V174L (VAL/LEU heterozygous) and of 38 patients treated with anti-CD19 CAR T cell (axi-cel and tisa-cel) targeting CD19 V174 (VAL/VAL homozygous) lymphoma.* ***B.*** *PFS Kaplan-Meier curve depicting retrospective analysis of 22 patients treated with tisa-cel and 11 patients treated with axi-cel targeting CD19 V174 (VAL/VAL homozygous) lymphoma.* ***C.*** *PFS**Kaplan-Meier curve depicting retrospective analysis of 35 patients treated with tisa-cel and 16 patients treated with axi-cel targeting CD19 V174L (VAL/LEU heterozygous) lymphoma. PFS= progression free survival, hom.=homozygous, het.=heterozyous*
